# Supplementary material for: Early Life Stress Induces Different Behaviors in Adolescence and Adulthood May Related With Abnormal Medial Prefrontal Cortex Excitation/Inhibition Balance
Source: PubMed Central journal article supplement (PMC8765554; doi:10.3389/fnins.2021.720286), 2022-01-04
Supplement: Table_1.pdf [file Table_1.pdf]

## Supplementary Table 1

### Identification of the chemical compounds in MRM mode

| Compound      | m/z         | Fragmentor | Collision Energy |
|---------------|-------------|------------|------------------|
| GABA          | 104.0/45.1  | 65         | 22               |
| Glutamate     | 148.0/84.0  | 75         | 13               |
| areoprenaline | 463.1/299.8 | 128        | 24               |
